# Supplementary material for: Experimental and theoretical studies of the molecular and crystal structures of trialkoxy- and chlorodialkoxy-stibanes †
Source: Royal Society of Chemistry journal article supplement (doi:10.1039/b007926j), 2001-01-01
Supplement: b007926j.doc [file b007926j.doc]

Supplementary Data for Manuscript B007926J

*“Experimental and Theoretical Studies of the Molecular and Crystal Structures of Trialkoxy- and Chlorodialkoxystibanes”*

[Sb(OCH3)3]

1\1\GINC-GOOFY\FOpt\RB3LYP\Gen\C3H9O3Sb1\FLEISCHE\31-Jan-2000\1\\# B3L

YP/LANL2DZ EXTRABASIS OPT=(Z-MATRIX, MAXCYC=100) FREQ\\Sb(OMe)3, C3, b

3lyp/lanl2dzp, opt freq\\0,1\Sb\X,1,1.\O,1,r1,2,a1\O,1,r1,2,a1,3,120.,

0\O,1,r1,2,a1,3,-120.,0\C,3,r2,1,a2,2,t1,0\C,4,r2,1,a2,2,t1,0\C,5,r2,1

,a2,2,t1,0\H,6,r3,3,a3,1,t2,0\H,6,r4,3,a4,1,t3,0\H,6,r5,3,a5,1,t4,0\H,

7,r3,4,a3,1,t2,0\H,7,r4,4,a4,1,t3,0\H,7,r5,4,a5,1,t4,0\H,8,r3,5,a3,1,t

2,0\H,8,r4,5,a4,1,t3,0\H,8,r5,5,a5,1,t4,0\\r1=1.95843512\r2=1.4310928\

r3=1.0999999\r4=1.10305706\r5=1.10086392\a1=118.7477052\a2=125.3396038

3\a3=107.64705059\a4=111.320416\a5=111.94379764\t1=143.78341252\t2=197

.57666403\t3=78.82521102\t4=-42.95911644\\Version=DEC-AXP-OSF/1-G94Rev

E.2\State=1-A\HF=-350.8898246\RMSD=8.298e-009\RMSF=2.799e-005\Dipole=0

.,0.,-0.5365608\PG=C03 [C3(Sb1),X(C3H9O3)]\\@

[ClSb(OCH3)2]

1\1\GINC-GOOFY\FOpt\RB3LYP\Gen\C2H6Cl1O2Sb1\FLEISCHE\04-Feb-2000\0\\#

B3LYP/LANL2DZ GEOM=CHECK EXTRABASIS OPT=(MAXCYC=100) FREQ\\SbCl(OMe)2,

C1, b3lyp/lanl2dzp, opt freq\\0,1\Sb,0.0062240665,-0.8364631723,1.0090

518101\O,-1.3616927646,0.5087006847,1.1388755926\O,-0.0450370827,-0.92

36564708,-0.9346403542\Cl,2.039579996,0.5727431427,1.1383638771\C,-1.4

648761376,1.6650982273,0.2852231542\C,1.0466998921,-1.3411608226,-1.76

46567727\H,-2.4356324086,2.132700719,0.4987405463\H,-0.6607398871,2.38

15733176,0.508360028\H,-1.4193905193,1.3840778796,-0.7757283772\H,1.37

4706551,-2.369013626,-1.5345682996\H,0.6899797431,-1.3186823067,-2.803

9056198\H,1.905792468,-0.6615202611,-1.6639846637\\Version=DEC-AXP-OSF

/1-G94RevE.2\State=1-A\HF=-250.7225689\RMSD=7.604e-009\RMSF=1.024e-005

\Dipole=-0.4251855,-0.7582426,-0.380549\PG=C01 [X(C2H6Cl1O2Sb1)]\\@

[Sb2(-OCH3)2(OCH3)4]

1\1\GINC-GOOFY\FOpt\RB3LYP\Gen\C6H18O6Sb2\FLEISCHE\27-Jan-2000\1\\# B3

LYP/LANL2DZ GEOM=CHECK EXTRABASIS OPT=(Z-MATRIX,MAXCYC=100) FREQ\\[Sb(

OMe)3]2, Ci, b3lyp/lanl2dzp, opt\\0,1\X\X,1,1.\Sb,1,s1,2,90.\Sb,1,s1,2

,90.,3,180.,0\O,1,s2,2,90.,3,t1,0\O,1,s2,2,90.,4,t1,0\C,5,s3,3,a1,6,t2

,0\C,6,s3,4,a1,5,-t2,0\O,3,s4,1,a2,5,t3,0\O,4,s4,1,a2,6,-t3,0\C,9,s5,3

,a3,1,t4,0\C,10,s5,4,a3,1,-t4,0\O,3,s6,1,a4,5,t5,0\O,4,s6,1,a4,6,-t5,0

\C,13,s7,3,a5,1,t6,0\C,14,s7,4,a5,1,-t6,0\H,15,s10,13,a8,3,t9,0\H,16,s

10,14,a8,4,-t9,0\H,15,s11,13,a9,3,t10,0\H,16,s11,14,a9,4,-t10,0\H,15,s

12,13,a10,3,t11,0\H,16,s12,14,a10,4,-t11,0\H,7,s13,5,a11,1,t12,0\H,7,s

14,5,a12,1,t13,0\H,7,s15,5,a13,1,t14,0\H,8,s13,6,a11,1,-t12,0\H,8,s14,

6,a12,1,-t13,0\H,8,s15,6,a13,1,-t14,0\H,11,s16,9,a14,3,t15,0\H,11,s17,

9,a15,3,t16,0\H,11,s18,9,a16,3,t17,0\H,12,s16,10,a14,4,-t15,0\H,12,s17

,10,a15,4,-t16,0\H,12,s18,10,a16,4,-t17,0\\s1=1.88380044\s2=1.29433154

\s3=1.43952673\s4=1.99383647\s5=1.42453272\s6=1.95292964\s7=1.43192037

\s10=1.10221066\s11=1.10035796\s12=1.10068307\s13=1.10083099\s14=1.100

14825\s15=1.09599185\s16=1.10690901\s17=1.10339082\s18=1.10163539\a1=1

25.1046964\a2=126.34277469\a3=120.85064278\a4=88.62635063\a5=122.80990

296\a8=111.08874553\a9=107.49780214\a10=111.94544572\a11=107.70770888\

a12=110.23898569\a13=110.46870917\a14=113.2805481\a15=110.94680998\a16

=108.96758302\t1=76.08992843\t2=155.28239619\t3=-5.84548079\t4=166.533

70725\t5=-101.99421066\t6=90.18411884\t9=282.54178319\t10=163.66368288

\t11=43.98657727\t12=-97.62775646\t13=20.93572634\t14=-216.92979138\t1

5=-22.87773548\t16=98.31921078\t17=-142.52889179\\Version=DEC-AXP-OSF/

1-G94RevE.2\State=1-AG\HF=-701.7977051\RMSD=9.191e-09\RMSF=6.308e-05\D

ipole=0.,0.,0.\PG=CI [X(C6H18O6Sb2)]\\@

[Sb2(-Cl)2(OCH3)4]

1\1\GINC-GOOFY\FOpt\RB3LYP\Gen\C4H12Cl2O4Sb2\FLEISCHE\26-Aug-2000\1\\#

B3LYP/LANL2DZ GEOM=CHECK EXTRABASIS OPT FREQ\\[ClSb(OMe)2]2, Cl verbrü

ckt, Ci, b3lyp/lanl2dzp, opt\\0,1\Sb,2.384304,0.,0.\Sb,-2.384304,0.,0.

\Cl,0.72831,-1.823299,0.\Cl,-0.72831,1.823299,0.\O,3.921379,-1.205763,

-0.030013\O,-3.921379,1.205763,0.030013\C,4.167541,-2.158913,-1.069021

\C,-4.167541,2.158913,1.069021\O,2.507843,0.312957,1.895869\O,-2.50784

3,-0.312957,-1.895869\C,2.843763,-0.697385,2.864297\C,-2.843763,0.6973

85,-2.864297\H,2.072252,-1.481432,2.89507\H,-2.072252,1.481432,-2.8950

7\H,2.890098,-0.197872,3.841846\H,-2.890098,0.197872,-3.841846\H,3.815

526,-1.157875,2.64026\H,-3.815526,1.157875,-2.64026\H,4.194154,-1.6933

2,-2.06969\H,5.151744,-2.608961,-0.875789\H,3.405239,-2.953248,-1.0695

04\H,-4.194154,1.69332,2.06969\H,-5.151744,2.608961,0.875789\H,-3.4052

39,2.953248,1.069504\\Version=DEC-AXP-OSF/1-G94RevE.2\State=1-AG\HF=-5

01.4654823\RMSD=7.443e-009\RMSF=2.465e-005\Dipole=0.,0.,0.\PG=CI [X(C4

H12Cl2O4Sb2)]\\@

[Sb2(Cl)2(-OMe)2(OMe)2]

1\1\GINC-GOOFY\FOpt\RB3LYP\Gen\C4H12Cl2O4Sb2\FLEISCHE\07-Feb-2000\1\\#

B3LYP/LANL2DZ GEOM=CHECK EXTRABASIS OPT=(Z-MATRIX,MAXCYC=100) FREQ\\[

SbCl(OMe)2]2, Ci, mp2/lanl2dzp, opt freq\\0,1\X\X,1,1.\Sb,2,s1,1,90.\S

b,2,s1,1,90.,3,180.,0\O,2,s2,1,90.,3,t1,0\O,2,s2,1,90.,5,180.,0\O,3,s3

,5,a1,4,t2,0\O,4,s3,6,a1,3,-t2,0\Cl,3,s4,7,a2,6,t3,0\Cl,4,s4,8,a2,5,-t

3,0\C,5,s5,3,a3,6,t4,0\C,6,s5,4,a3,5,-t4,0\C,7,s6,3,a4,2,t5,0\C,8,s6,4

,a4,2,-t5,0\H,11,s7,5,a5,2,t6,0\H,11,s8,5,a6,2,t7,0\H,11,s9,5,a7,2,t8,

0\H,12,s7,6,a5,2,-t6,0\H,12,s8,6,a6,2,-t7,0\H,12,s9,6,a7,2,-t8,0\H,13,

s10,7,a8,3,t9,0\H,13,s11,7,a9,3,t10,0\H,13,s12,7,a10,3,t11,0\H,14,s10,

8,a8,4,-t9,0\H,14,s11,8,a9,4,-t10,0\H,14,s12,8,a10,4,-t11,0\\s1=1.8429

7797\s2=1.2992785\s3=1.93963151\s4=2.46508585\s5=1.44447375\s6=1.43537

904\s7=1.10005956\s8=1.09867281\s9=1.09609306\s10=1.09924303\s11=1.099

32922\s12=1.10089412\a1=95.07705992\a2=95.97385493\a3=126.25908334\a4=

125.48422\a5=107.52422718\a6=110.4368953\a7=110.3878033\a8=111.3500179

8\a9=106.90292126\a10=111.47247325\t1=78.53944451\t2=80.52369849\t3=19

8.3431435\t4=149.79671698\t5=97.92753304\t6=-98.46292676\t7=20.4123816

4\t8=-217.31868385\t9=66.73649191\t10=185.99488946\t11=-54.94311538\\V

ersion=DEC-AXP-OSF/1-G94RevE.2\State=1-AG\HF=-501.4813948\RMSD=4.933e-

09\RMSF=9.399e-05\Dipole=0.,0.,0.\PG=CI [X(C4H12Cl2O4Sb2)]\\@
